# Supplementary material
Source: MDPI journal article supplement (https://www.mdpi.com/2225-1154/9/6/92)
Supplement: s1 [file s1]

## Supplementary Material

# Water quality threats, perceptions of climate change and behavioral responses among farmers in the Ethiopian Rift Valley

Tewodros R. Godebo<sup>a\*</sup>, Marc A. Jeuland<sup>b</sup>, Christopher J. Paul<sup>c</sup>, Dagnachew L. Belachew<sup>d</sup> and Peter G. McCornick<sup>e</sup>

<sup>a</sup>Department of Environmental Health Sciences, School of Public Health and Tropical Medicine, Tulane University, New Orleans, LA 70112 USA. Email: [tgodebo@tulane.edu](mailto:tgodebo@tulane.edu)

<sup>b</sup>Sanford School of Public Policy, Duke University, Box 90239, Durham, NC 27708 USA. Email: [marc.jeuland@duke.edu](mailto:marc.jeuland@duke.edu)

<sup>c</sup>Department of Public Administration, North Carolina Central University, 1801 Fayetteville St, Durham, NC 27707, USA Email: [cpaul5@ncsu.edu](mailto:cpaul5@ncsu.edu)

<sup>d</sup>School of Earth Sciences, Addis Ababa University (AAU), P.O.Box 1176, Addis Ababa, Ethiopia. Email: [dagnachew1@gmail.com](mailto:dagnachew1@gmail.com)

<sup>e</sup>Daugherty Water for Food Global Institute (DWFI), University of Nebraska, Lincoln, NE, USA. Email: [pmccornick@nebraska.edu](mailto:pmccornick@nebraska.edu)

### Table of contents

**Figure S1.** Guidelines for saline-sodic water quality suitability for irrigation, presented in terms of reduced infiltration.

**Figure S2.** Relative importance of factors determining a bad crop year

**Figure S3.** Farmers' perception on barriers to adaptation

**Table S1.** Regression of adaptation behaviors on farmer characteristics

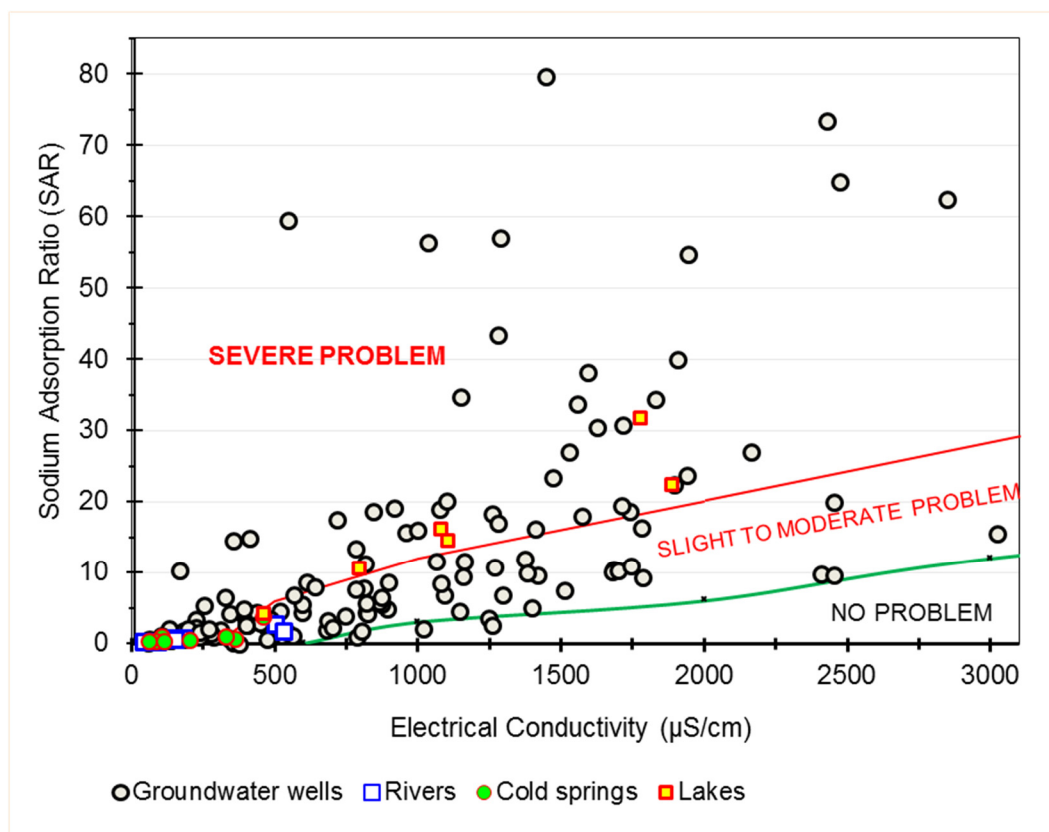

**Figure S1.** Guidelines for saline-sodic water quality suitability for irrigation, presented in terms of reduced infiltration.

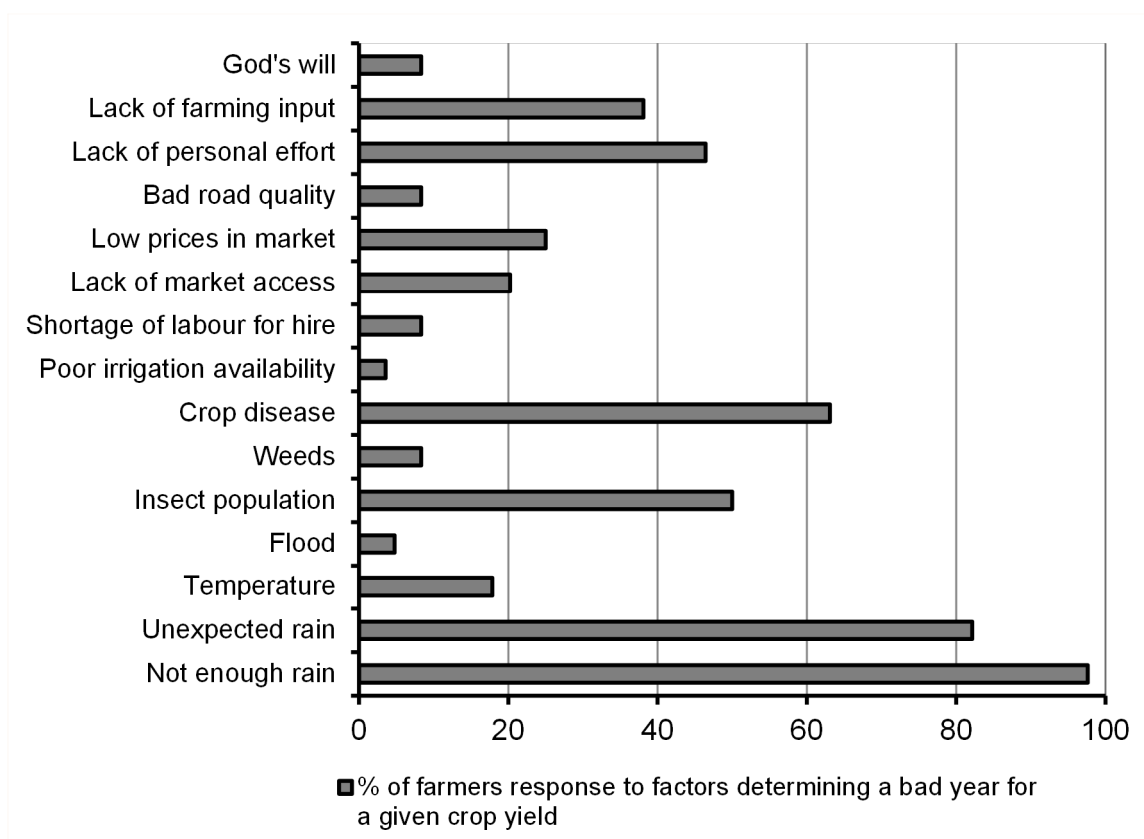

**Figure S2.** Relative importance of factors determining a bad crop year.

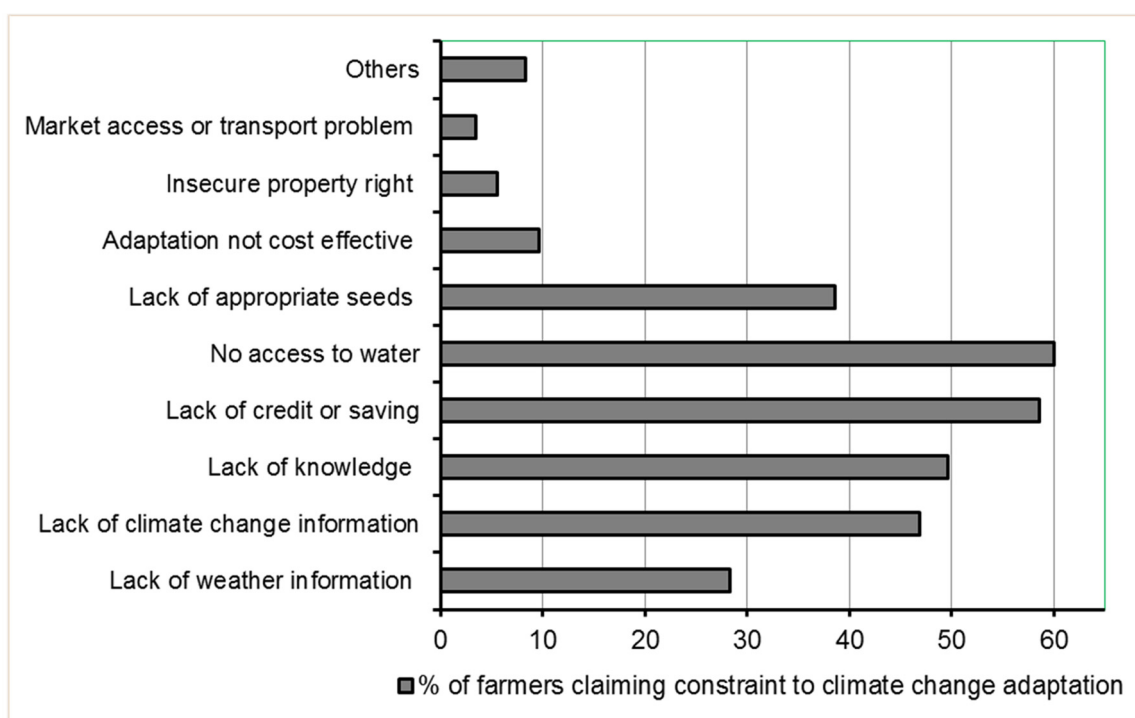

**Figure S3.** Farmers' perception on barriers to adaptation.
